# Supplementary material for: Nonclinical Evaluation of Novel Cationically Modified Polysaccharide Antidotes for Unfractionated Heparin
Source: PubMed Central journal article supplement (PMC4362941; doi:10.1371/journal.pone.0119486), 2015-03-17
Supplement: pone.0119486.s003.pdf [file pone.0119486.s003.pdf]

**S3 File. Mean blood pressure (MBP) course in rats one hour after administration of the polymers and protamine.**

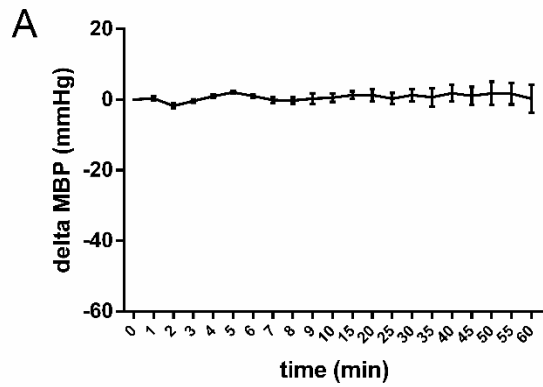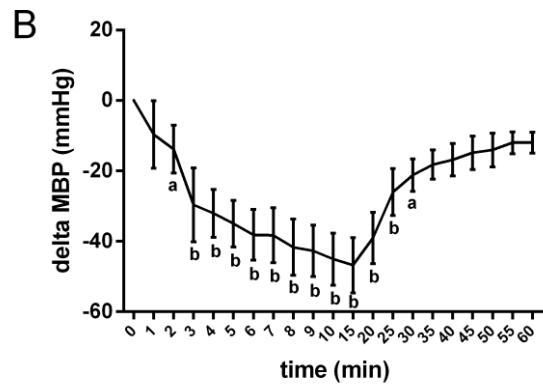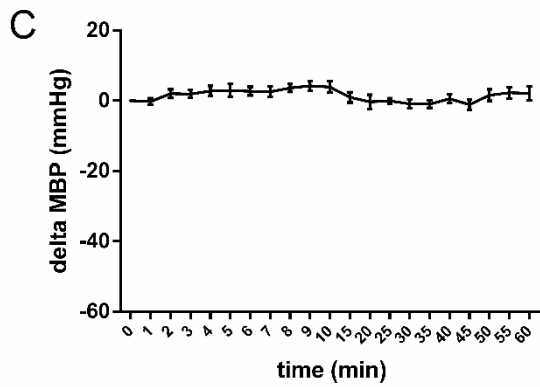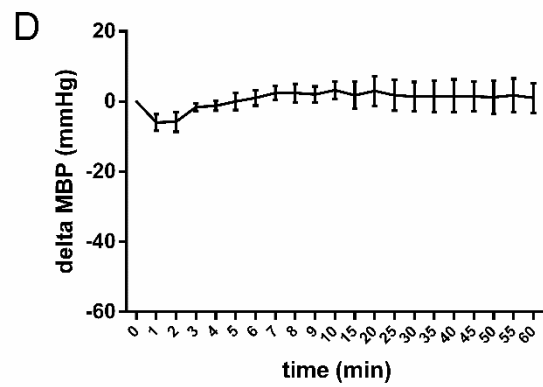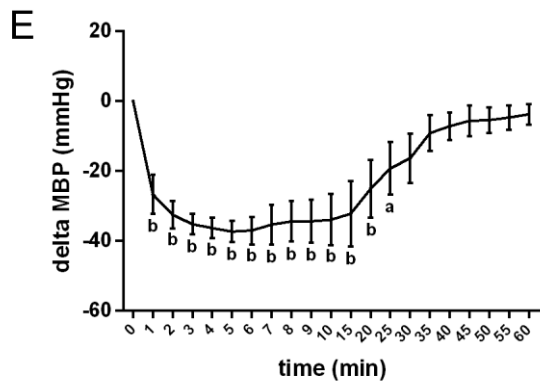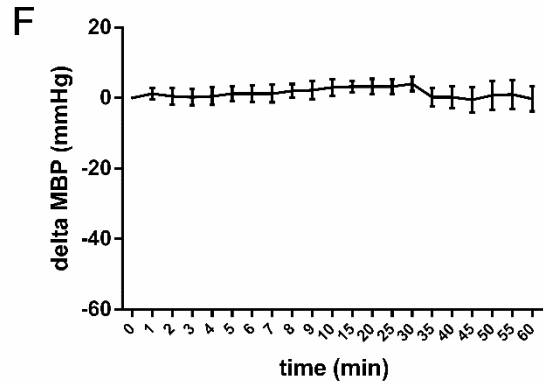

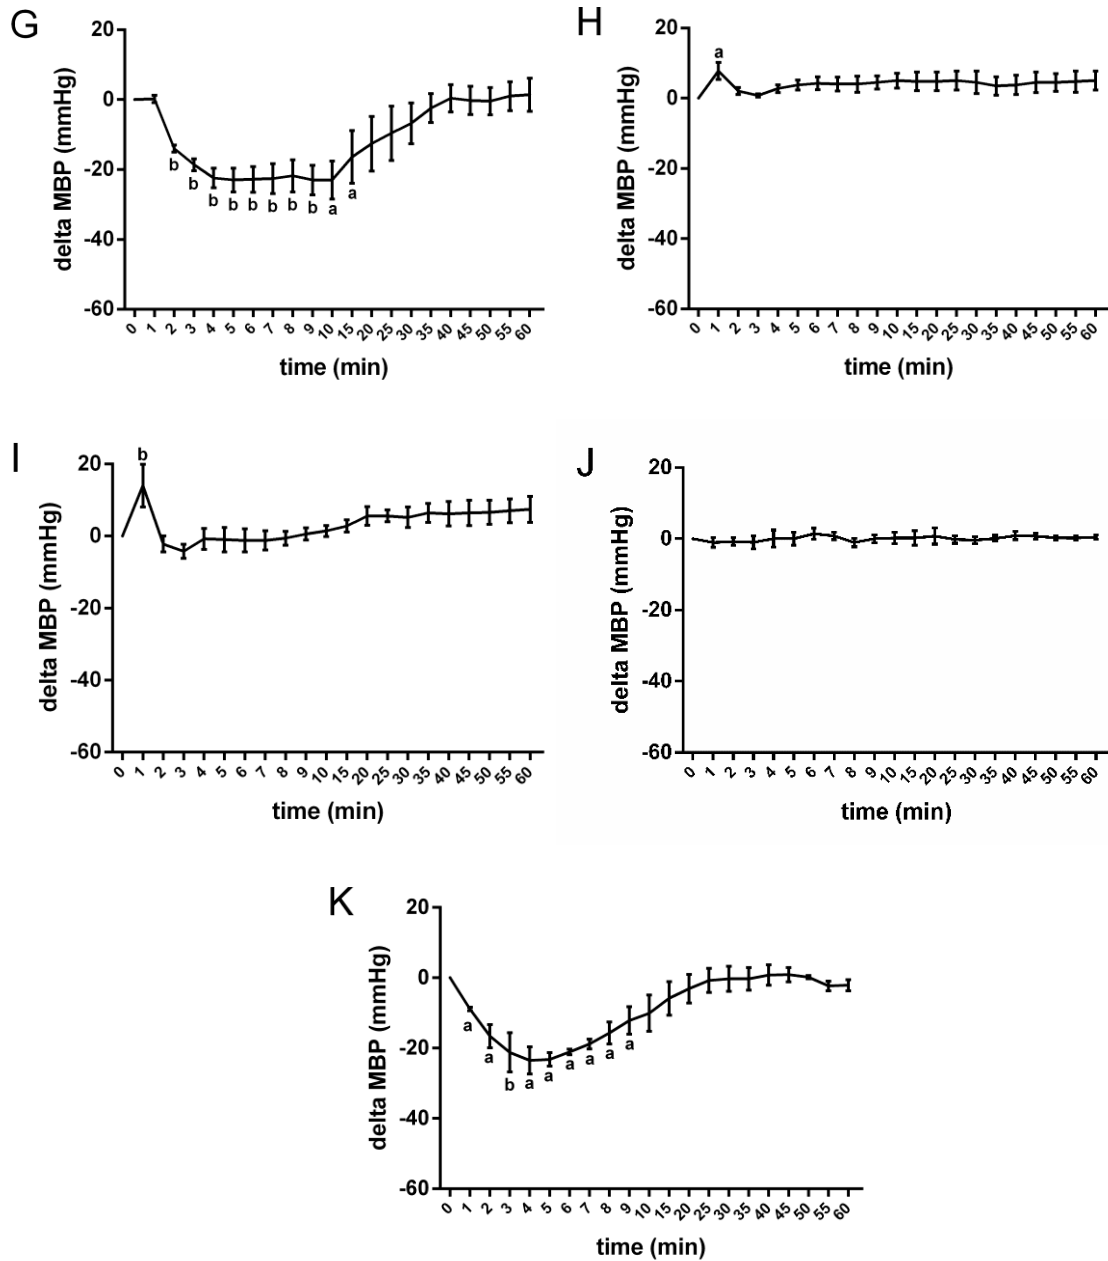

**Figure A.** Lines represent the course of MBP registered for 60 min after *iv* administration of Dex40-GTMAC2 (4.2 and 12.5 mg·kg<sup>-1</sup>; A and B, respectively), Dex40-GTMAC3 (2.5, 7.5 and 22.5 mg·kg<sup>-1</sup>; C, D and E, respectively), Dex6-GTMAC (9.6 and 28.8 mg·kg<sup>-1</sup>; F and G, respectively), GCD-GTMAC2 (10.8 and 32.4 mg·kg<sup>-1</sup>; H and I, respectively), and protamine (3 and 9 mg·kg<sup>-1</sup>; J and K, respectively), a-P<0.05, b-P<0.01 vs. vehicle, Mann-Whitney test. Results are shown as mean ± SEM, n = 4-5.

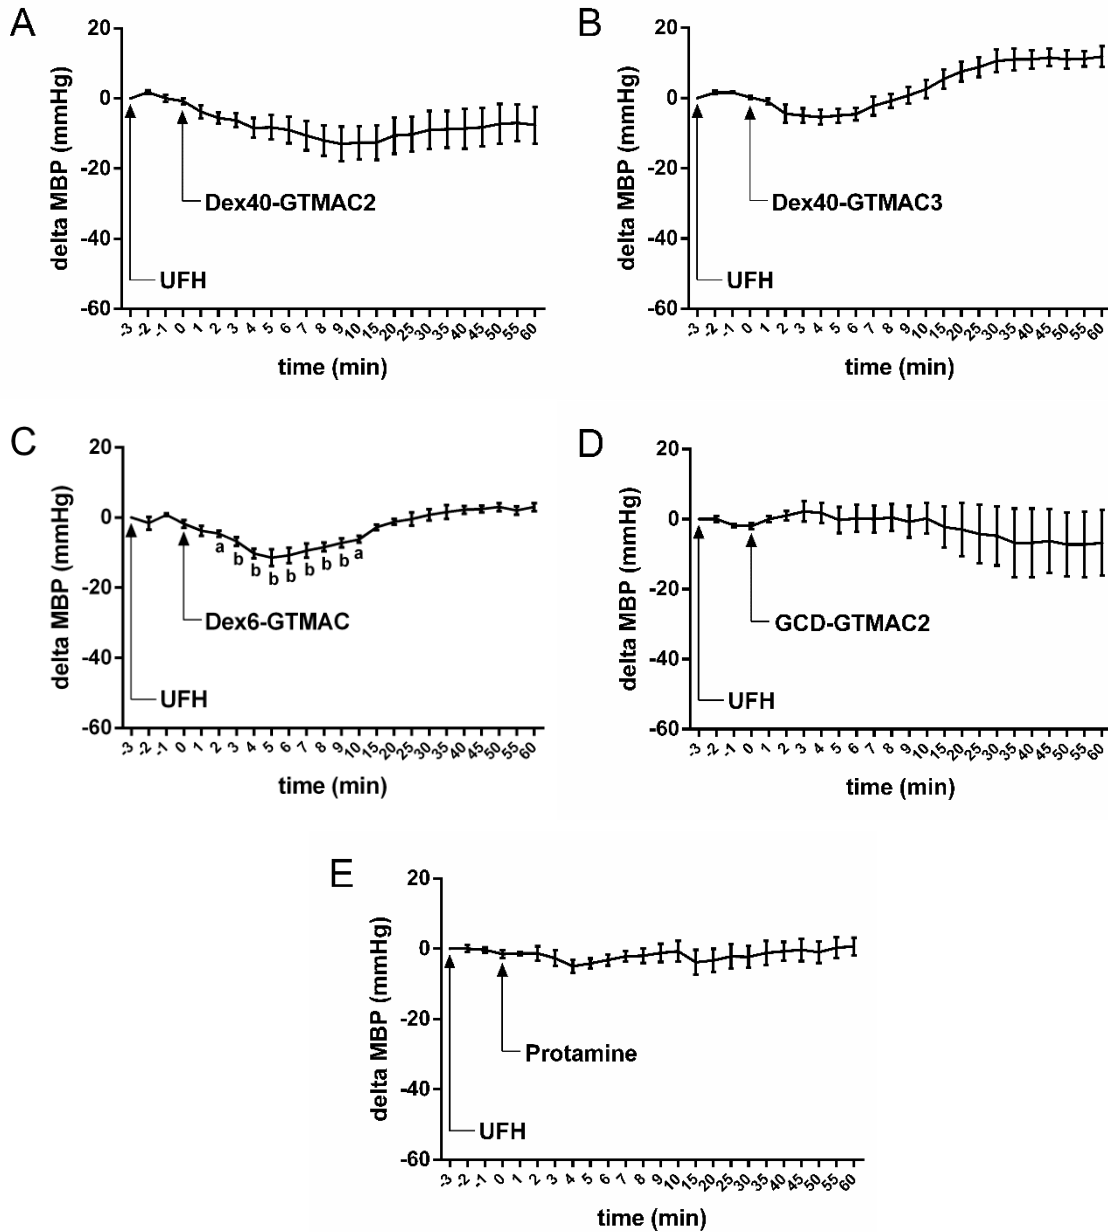

**Figure B.** Lines represent course of mean blood pressure (MBP) registered for 60 min after *iv* administration of UFH ( $300 \text{ U} \cdot \text{kg}^{-1}$ ) followed by Dex40-GTMAC2 ( $12.5 \text{ mg} \cdot \text{kg}^{-1}$ ; A), Dex40-GTMAC3 ( $7.5 \text{ mg} \cdot \text{kg}^{-1}$ ; B), Dex6-GTMAC ( $9.6 \text{ mg} \cdot \text{kg}^{-1}$ ; C), GCD-GTMAC2 ( $10.8 \text{ mg} \cdot \text{kg}^{-1}$ ; D), and protamine ( $3 \text{ mg} \cdot \text{kg}^{-1}$ ; E), a- $P < 0.05$ , b- $P < 0.01$  vs. vehicle, Mann-Whitney test. Results are shown as mean  $\pm$  SEM,  $n = 4-6$ .

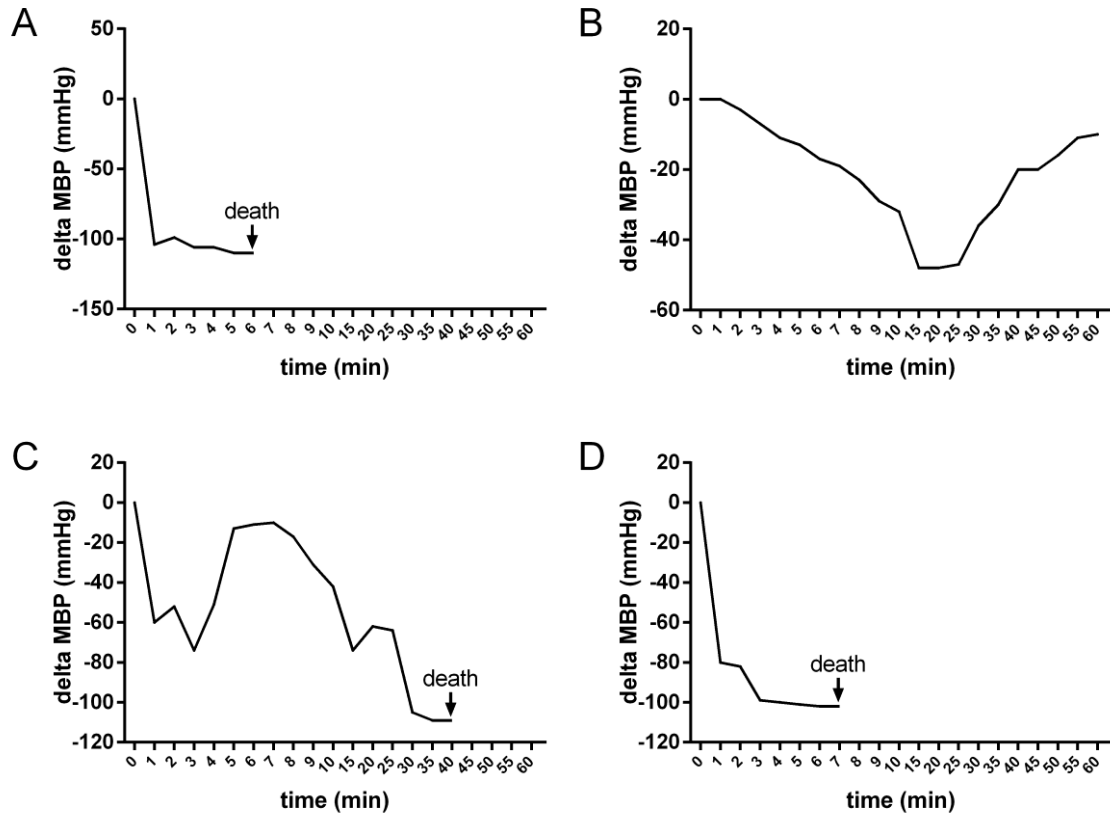

**Figure C.** Lines represent the course of MBP registered for 60 min after *iv* administration of Dex40-Spm (9 mg·kg<sup>-1</sup>; A), Dex40-PAH-Arg (32.4 mg·kg<sup>-1</sup>; B), Pul-GTMAC (21.6 mg·kg<sup>-1</sup>; C), and HPC-APTMAC2 (10.8 mg·kg<sup>-1</sup>; D) into 1 rat.
